# Supplementary material
Source: PubMed Central journal article supplement (PMC4093833)
Supplement: NIHMS601944-supplement-01.pdf [file NIHMS601944-supplement-01.pdf]

**Supplementary Table 1. Prevalence of preclinical CVD among Strong Heart Study participants**

|                                     | No CVD        |              |              | CVD             |              |              |
|-------------------------------------|---------------|--------------|--------------|-----------------|--------------|--------------|
|                                     | Normal(n=646) | MS (n=871)   | DM (n=1356)  | No MS/DM (n=58) | MS (n=75)    | DM (n=219)   |
| Ankle brachial index (ABI)          |               |              |              |                 |              |              |
| Mean ABI (ratios)                   |               |              |              |                 |              |              |
| Male                                | 1.2 (0.1)     | 1.2 (0.1)    | 1.1 (0.2)    | 1.1 (0.2)       | 1.1 (0.2)*   | 1.1 (0.2)*   |
| Female                              | 1.1 (0.1)     | 1.1 (0.1)    | 1.1 (0.2)    | 1.1 (0.1)       | 1.0 (0.2)    | 1.0 (0.2)*   |
| Abnormal ABI <sup>†</sup>           |               |              |              |                 |              |              |
| Male                                | 6% (3-9)      | 2% (1-4)     | 10% (7-13)*  | 8% (-1-17)      | 20% (7-33)*  | 17% (9-26)*  |
| Female                              | 6% (3-8)      | 5% (3-7)     | 11% (9-13)*  | 13% (-4-31)     | 25% (10-40)* | 22% (14-31)* |
| LV ejection fraction (EF)           |               |              |              |                 |              |              |
| Mean EF                             |               |              |              |                 |              |              |
| Male                                | 0.6 (0.1)     | 0.6 (0.1)    | 0.6 (0.1)    | 0.6 (0.1)       | 0.5 (0.1)*   | 0.5 (0.2)*   |
| Female                              | 0.7 (0.1)     | 0.7 (0.1)    | 0.6 (0.1)    | 0.6 (0.2)*      | 0.6 (0.1)    | 0.6 (0.1)*   |
| Reduced EF <sup>‡</sup>             |               |              |              |                 |              |              |
| Male                                | 15% (11-19)   | 16% (11-20)  | 22% (17-26)* | 25% (11-39)     | 59% (42-75)* | 57% (46-68)* |
| Female                              | 7% (4-9)      | 6% (4-8)     | 9% (7-11)    | 33% (12-55)*    | 14% (1-26)   | 25% (17-33)* |
| LV mass index (g/m <sup>2.7</sup> ) |               |              |              |                 |              |              |
| Mean LV mass index                  |               |              |              |                 |              |              |
| Male                                | 36.0 (7.5)    | 39.8 (8.5)*  | 40.5 (9.2)*  | 42.3 (11.1)*    | 45.7 (10.6)* | 51.4 (14.5)* |
| Female                              | 37.6 (10.2)   | 42.6 (10.1)* | 43.9 (11.1)* | 51.2 (14.2)*    | 48.6 (13.9)* | 50.9 (13.1)* |
| LV hypertrophy <sup>§</sup>         |               |              |              |                 |              |              |
| Male                                | 4% (2-6)      | 14% (10-18)* | 17% (13-20)* | 19% (7-32)*     | 35% (19-51)* | 48% (37-58)* |
| Female                              | 16% (11-20)   | 28% (24-31)* | 34% (31-37)* | 56% (33-79)*    | 48% (30-67)* | 62% (53-72)* |
| LVWM abnormality <sup>¶</sup>       |               |              |              |                 |              |              |
| Male                                | 4% (2-7)      | 4% (2-6)     | 9% (6-11)*   | 11% (1-20)      | 19% (6-32)*  | 23% (15-32)* |
| Female                              | 4% (1-6)      | 3% (1-4)     | 3% (2-4)     | 22% (3-41)*     | 3% (-3-8)    | 11% (5-17)*  |

Data in parentheses are 1 SD for continuous variables and 95% CI for percentages. \*For continuous variables, general linear models were used; for categorical variables,  $\chi^2$  tests were used to test significant difference for MS, DM or CVD us. Normal. <sup>†</sup> Abnormal ABI was defined as ratio <0.90 or ratio >1.40. <sup>‡</sup> Left ventricular ejection fraction dysfunction was defined as value <0.54. <sup>§</sup> The Strong Heart Study indicated that LV hypertrophy was defined as LV mass index >49.2 g/m<sup>2.7</sup> in men, and >46.7 g/m<sup>2.7</sup> in women. <sup>¶</sup> Left ventricular wall movement abnormality.
