# Supplementary material
Source: PubMed Central journal article supplement (PMC4093833)
Supplement: NIHMS601944-supplement-02.pdf [file NIHMS601944-supplement-02.pdf]

**Supplementary Table 2. Cox Proportional-Hazard models for the prediction of incident coronary heart disease or incident congestive heart failure, based on metabolic syndrome, diabetes and quartiles of pulmonary function tests**

| Model                                   | Variable                           | Relative risk (95% CI) | p Value  | Covariates                                                                       |
|-----------------------------------------|------------------------------------|------------------------|----------|----------------------------------------------------------------------------------|
| Predict CHD incidence*                  |                                    |                        |          |                                                                                  |
| Forced Vital Capacity                   | FVC% predicted ( $\geq 103.8\%$ )  | 1.0                    |          | age, sex, center, albuminuria, hypertension<br>high non-HDL cholesterol, smoking |
|                                         | FVC% predicted (93.4-103.8%)       | 1.0 (0.8-1.2)          | 0.82     |                                                                                  |
|                                         | FVC% predicted (82.8-93.4%)        | 1.0 (0.8-1.3)          | 0.94     |                                                                                  |
|                                         | FVC %predicted ( $< 82.8\%$ )      | 1.1 (0.8-1.3)          | 0.68     |                                                                                  |
|                                         | MS vs. Normal                      | 1.2 (0.9-1.6)          | 0.24     |                                                                                  |
|                                         | DM vs. Normal                      | 2.4 (1.8-3.1)          | $< 0.01$ |                                                                                  |
| Forced Expiratory<br>Volume in 1 second | FEV1% predicted ( $\geq 103.4\%$ ) | 1.0                    |          | age, sex, center, albuminuria, hypertension<br>high non-HDL cholesterol, smoking |
|                                         | FEV1% predicted (92.9-103.4%)      | 0.9 (0.7-1.1)          | 0.38     |                                                                                  |
|                                         | FEV1% predicted (81.6-92.9%)       | 1.1 (0.8-1.3)          | 0.66     |                                                                                  |
|                                         | FEV1 %predicted ( $< 81.6\%$ )     | 1.0 (0.8-1.2)          | 0.91     |                                                                                  |
|                                         | MS vs. Normal                      | 1.2 (0.9-1.6)          | 0.23     |                                                                                  |
|                                         | DM vs. Normal                      | 2.4 (1.8-3.1)          | $< 0.01$ |                                                                                  |
| Predict CHF incidence*                  |                                    |                        |          |                                                                                  |
| Forced Vital Capacity                   | FVC% predicted ( $\geq 103.8\%$ )  | 1.0                    |          | age, center, albuminuria, hypertension                                           |
|                                         | FVC% predicted (93.4-103.8%)       | 1.3 (0.8-2.0)          | 0.28     |                                                                                  |
|                                         | FVC% predicted (82.8-93.4%)        | 1.9 (1.3-2.9)          | $< 0.01$ |                                                                                  |
|                                         | FVC %predicted ( $< 82.8\%$ )      | 2.1 (1.4-3.2)          | $< 0.01$ |                                                                                  |
|                                         | MS vs. Normal                      | 0.9 (0.5-1.5)          | 0.59     |                                                                                  |
|                                         | DM vs. Normal                      | 1.9 (1.2-3.0)          | $< 0.01$ |                                                                                  |
| Forced Expiratory<br>Volume in 1 second | FEV1% predicted ( $\geq 103.4\%$ ) | 1.0                    |          | age, center, albuminuria, hypertension                                           |
|                                         | FEV1% predicted (92.9-103.4%)      | 1.8 (1.2-2.8)          | $< 0.01$ |                                                                                  |
|                                         | FEV1% predicted (81.6-92.9%)       | 1.8 (1.2-2.8)          | $< 0.01$ |                                                                                  |
|                                         | FEV1 %predicted ( $< 81.6\%$ )     | 2.2 (1.5-3.4)          | $< 0.01$ |                                                                                  |
|                                         | MS vs. Normal                      | 0.9 (0.6-1.5)          | 0.77     |                                                                                  |
|                                         | DM vs. Normal                      | 2.1 (1.3-3.2)          | $< 0.01$ |                                                                                  |

CHD: coronary heart disease; CHF: congestive heart failure. Models were reduced by stepwise selection; pulmonary function, DM, MS were

forced into the model. \*Covariates considered were demographic factors, hypertension, high non-HDL cholesterol, albuminuria; all covariates

were candidates for removal; covariates remained significant ( $p \leq 0.05$ ) shown in the table.
